# Supplementary material
Source: Research Square preprint supplement (doi:10.21203/rs.3.rs-9003710/v1)
Supplement: Supplementary file 1 [file af989810f26066034d317abd.docx]

Tafawa Belewa

**Basic CLTs Key Principle on Tafawa Belewa**

Source: Field Survey 2025

The chat Basic CLTS Key Principle in Tafawa Balewa presents data on community perceptions or awareness of key principles of Community-Led Total Sanitation (CLTS). All of the Above" has the highest percentage (24.8%). This suggests that nearly a quarter of respondents recognize that multiple factors work together as key principles of CLTS, which is a positive indication of holistic understanding. Forms of Open Defecation (21.4%) is the most recognized individual component. This indicates strong awareness about the problem CLTS aims to address. Sustainable Solutions (14.8%) also ranks high, showing that many respondents see the importance of long-term sanitation strategies. Triggering Events is the least recognized at 5.8%, despite being a core method used in CLTS to provoke community-led action. This might indicate a gap in understanding the practical methods of initiating change.

**Effects of CTLS on the Environment**

Source: Field Survey 2025

The chat titled Effects of CLTS on the Environment evaluates how Community-Led Total Sanitation (CLTS) initiatives impact various environmental and public health factors. The highest percentage (27.4%) chose “All of the Above”, showing a strong recognition that CLTS positively affects multiple environmental and health areas. Promotes Hygiene (14%) is the most identified individual impact, indicating that CLTS's role in improving personal and communal hygiene is well understood. Responses like Minimize Air Pollution (8.2%), Community Engagement (8%), and Minimize Open Defecation (7.9%) are also relatively high, reflecting an awareness of CLTS’s environmental benefits. Minimize Soil Pollution (5.8%) and Clean Environment (6.6%) are on the lower end. These may be less immediately visible effects or not as well communicated.

**Mode of Operation of CTLS in Tafawa Belewa**

Source: Field Survey 2025

The third table, "Mode of Operation of CLTS in Tafawa Balewa", explores respondents' understanding of the main operational components of Community-Led Total Sanitation (CLTS). The majority (42%) selected “All of the Above”, showing that many respondents recognize CLTS as a comprehensive strategy combining multiple modes of operation. Sustainability received the highest individual percentage at 13.5%, highlighting a strong understanding of the importance of long-term solutions in CLTS. Community Mobilization and Sanitation Profile also scored relatively high, indicating awareness of foundational activities needed to drive behavior change. Triggering Events (10.8%) and Collective Action (10.6%) are slightly lower, suggesting some gaps in understanding the catalytic and group-based elements of CLTS operations.

**Benefit of |Community Led Total Sanitation in Tafawa Balewa**

Source: Field Survey 2025

From the chat is a detailed analysis of the "Benefit of Community-Led Total Sanitation (CLTS) in Tafawa Balewa" based on the provided chat. All of the Above (37.5%) is the most selected option, showing that over one-third of respondents understand CLTS provides multiple benefits across sanitation, health, empowerment, and the environment. Improved Sanitation (15%) and Improved Waste Management (14.2%) were the most frequently cited individual benefits. This reflects that tangible outcomes like cleaner environments and proper waste handling—are among the most visible and appreciated results of CLTS efforts. Health Benefits (9.5%) and Reduced Pollution (8.2%) were recognized, but to a lesser extent. These benefits, though crucial, might not be as directly observable or immediate to communities. Sustainable Solutions (7.7%) and Community Empowerment (8.0%) had the lowest individual recognition. This suggests that while these outcomes are longer-term and systemic, they might require more communication and community engagement to be fully appreciated.

**Reasons for High Open Defecation Rate in Tafawa Balewa**

Source: Field Survey 2025.

The chat give an in-depth analysis of the table titled "Reasons for High Open Defecation Rate in Tafawa Balewa. The largest portion of respondents (23%) chose “All of the Above”, suggesting a broad understanding that the issue is not caused by one factor alone but by a combination of cultural, infrastructural, financial, and governance challenges. Paucity of Funds (21.4%) and Insufficient Sanitation Facilities (19.3%) are the most cited individual causes. This shows the community perceives lack of resources and inadequate infrastructure as central obstacles. Culture (10.8%) remains a notable factor—indicating that traditional practices and norms still play a role in open defecation habits. Inadequate Awareness (5.5%), Policy Gaps (5.8%), and Interagency Coordination (6.6%) are recognized but may be underemphasized, despite their potential to create lasting change if addressed. Low Enforcement Rate (2.6%) and High Population Growth (5%) are the least acknowledged. These might be less visible but could be critical in the long run if not managed effectively.

**Sanitation and Hygiene Enforcement in Tafawa Balewa LGA**

Source: Field Survey 2025

Here’s a detailed analysis of the chat titled “Sanitation and Hygiene Enforcement in Tafawa Balewa LGA”, which outlines the perceived responsibility or enforcement level across different societal actors. The majority (34%) selected “All of the Above”, indicating a strong belief that sanitation and hygiene enforcement is a collective responsibility involving every level of society. The individual categories (13%–14%) show relatively even recognition, which means respondents see all actors as important but none as solely responsible. Office/Employer (14%) is the highest among individual roles, hinting at the importance placed on workplace hygiene enforcement likely due to increased awareness in institutional settings. Government (12.4%) is slightly lower, suggesting that while it's recognized, there may be reduced trust or expectation of effective enforcement from authorities.

**Effects of CLTS on Availability of Sanitation Facilities in Tafawa Balewa**

Source: Field Survey 2025

Here’s an in-depth analysis of the table titled “Effects of CLTS on Availability of Sanitation Facilities in Tafawa Balewa. The highest percentage (24.5%) of respondents selected All of the Above which reflects an appreciation for the comprehensive improvements brought about by CLTS. Monthly Environmental Sanitation (22.7%) stands out as the highest individual response, suggesting that CLTS has institutionalized sanitation practices and fostered a sense of routine hygiene responsibility in the community. Improved Health of Residents (11.3%) and Reduced Waterborne Diseases (9.0%) highlight the visible health benefits that the community attributes to improved sanitation access and usage. Increased Toilets (8.7%) and Construction of Public Toilets (7.7%) confirm that CLTS has translated into physical development, although they are seen as part of a larger package of improvements. The Near ODF Status (8.2%) metric shows the momentum towards open defecation elimination, even if complete status hasn't yet been achieved.

**Nature of Sanitation and Hygiene Activities**

Source: Field Survey 2025

Here’s a comprehensive analysis of the table titled “Nature of Sanitation and Hygiene Activities” in Tafawa Balewa. The majority (33%) selected “All of the Above”, signaling that most respondents recognize sanitation and hygiene as involving a wide range of interconnected activities, from practical cleaning to awareness creation. Mopping, often associated with indoor cleanliness (especially in homes, schools, offices), ranks highest among individual tasks, suggesting a strong emphasis on maintaining indoor hygiene. Sweeping (10.8%) and Cutting of Grass (9.5%) are common, visible tasks typically associated with outdoor environmental cleanliness, these activities might also reflect community participation during designated sanitation days. Creation of Awareness (9.0%) indicates a decent level of appreciation for the educational and behavioral components of sanitation campaigns—an important part of sustainability. Cleaning of Toilets (7.4%) and Waste Evacuation (8.2%) are slightly less emphasized possibly due to social taboos or stigma around these roles. Limited access to facilities or structured waste collection services.

**Nature of Sanitation and Hygiene Facilities in the Area**

Source: Field Survey 2025

The highest individual facility availability is latrines (20.6%), followed by garbage bins (17.7%) and toilets (13%), Facilities essential for basic hygiene such as hand washing basins (9.2%) and public bathing facilities (2.6%) are relatively low, Critical infrastructure like sewage treatment (3.2%) and solid waste landfills (4%) are scarce and Encouragingly, 29.8% of the area has all of the above facilities, indicating nearly a third of the region has comprehensive sanitation coverage.

**Nature of Waste Generated in the Area**

Source: Field Survey 2025

The chat present the **Nature of Waste Generated** in the given area based on the percentages. 

Over one-third of respondents (36.7%) reported **"All of the Above"**, indicating that multiple types of waste are being generated in the same locations. This suggests **mixed or unsorted waste**, which can complicate waste management and recycling efforts. **Sewage (12.9%)** and **Plastic (12.1%)** are the most frequently reported specific waste types. This reflects potential issues with sanitation infrastructure and plastic consumption/disposal habits. **Human Faeces (10%)** and **Food Waste (9.2%)** indicate both sanitary challenges and a need for better composting or food waste reduction strategies. **Yard/Paper waste (11.1%)** suggests common domestic or institutional waste typical in residential areas. **Glass/Metal Waste (7.9%)** is still relevant, though lower in proportion, but can pose safety and environmental hazards if not properly disposed.

**Frequency of Sanitation and Hygiene Activities**

Source: Field Survey 2025

Here's an analysis of the Frequency of Sanitation and Hygiene Activities. Most Common Practice Hourly 2.6% Daily 22.7%, Weekly 19.0%, Monthly 10.8%, Varied 26.9% and All of the Above 31.9%. All of the Above" (31.9%) the most frequently reported response is "All of the Above", which suggests that a significant number of participants engage in sanitation and hygiene activities at multiple time intervals. This could reflect a comprehensive approach to hygiene practices. High Variability (26.9%) The second highest category is "Varied", indicating that many respondents do not follow a fixed schedule. This might suggest flexibility or inconsistency in hygiene behavior depending on situational factors. Daily Practices are Substantial (22.7%) A strong portion of respondents report daily hygiene activities, which is a positive indicator of consistent behavior. Hourly (2.6%), Weekly (5%), and Monthly (10.8%) are relatively low, which makes sense given that hygiene practices are typically not performed strictly on these rigid schedules alone.

**B. Behavior Change**

Strongly Disagree 28.2%, Disagree 18.5%, Somewhat Disagree 16.1%, Neutral 11.3%, Somewhat Agree 10.8%, Agree 9.2% and Strongly Agree 5.8% A significant 62.8% of respondents disagreed to some degree that behavior change was achieved. Only 25.8% showed any agreement, and even that was mostly lukewarm. The presence of a sizable neutral (11.3%) segment may indicate uncertainty or lack of visible outcomes.

**C. Participatory Approach**

Very Ineffective 12.7%, Ineffective 25.2%, Somewhat Ineffective 20.3% Effective 25.6% and Very Effective 15.6%. This category is more balanced than the others. Roughly 53.7% rated it as effective or very effective, while 58.2% saw it as ineffective to some degree — the overlap indicates a split perception. Suggests that while participatory methods were introduced, implementation quality varied across groups. Combining the two “Very Helpful” entries (48 + 43), the total becomes 91 (24%). Most respondents (67.6%) rated the triggering event as “Helpful” or “Somewhat Helpful. Only 8.4% found it unhelpful, suggesting the triggering event was largely effective in engaging the community.

**D. Collective Action**

Very Useless 11.6%, Useless 20.1%, Somewhat Useless 28.0%, Useful 35.1% and Very Useful 5.3% 59.7% rated collective action as useless or somewhat useless, while only 40.4% found it useful. The limited “Very Useful” rating (5.3%) shows that collective mobilization either lacked scale, was inconsistent, or poorly facilitated. May reflect weak group cohesion or limited motivation to sustain group-led initiatives.
